# Supplementary material
Source: PubMed Central journal article supplement (PMC4774248)
Supplement: NIHMS759221-supplement-Supplemental_Materials.pdf [file NIHMS759221-supplement-Supplemental_Materials.pdf]

1 SUPPORTING INFORMATION

2 Human Serum from Urban and Rural Adolescents and Their Mothers Shows Exposure to  
3 Polychlorinated Biphenyls Not Found in Commercial Mixtures

4  
5 *Wen Xin Koh*<sup>†</sup>, *Keri C. Hornbuckle*<sup>†,‡,\*</sup>, *Peter S. Thorne*<sup>†,§,\*</sup>

6  
7 <sup>†</sup>Interdisciplinary Graduate Program in Human Toxicology, The University of Iowa, Iowa City, Iowa  
8 52242, United States

9 <sup>‡</sup>Department of Civil and Environmental Engineering, The University of Iowa, Iowa City, Iowa 52242,  
10 United States

11 <sup>§</sup>Department of Occupational and Environmental Health, The University of Iowa, Iowa City, Iowa  
12 52242, United States

13  
14 Corresponding authors:

15 \* Phone: (319) 335-4216 (P.S.T.); 319-384-0789 (K.C.H.). Fax: (319) 384-4138 (P.S.T.); (319) 335-  
16 5660 (K.C.H.). Email: peter-thorne@uiowa.edu (P.S.T.); keri-hornbuckle@uiowa.edu (K.C.H.).

17  
18  
19 Number of pages: 10

20 Number of figures: 2

21 Number of tables: 3

23 **Table S1.** A list of  $^{13}\text{C}$ -labelled PCB surrogate standards and internal standards

| Congener                  | Mean recovery (SD) |
|---------------------------|--------------------|
| <i>Surrogate Standard</i> |                    |
| $^{13}\text{C}$ PCB 3     | 55% (16%)          |
| $^{13}\text{C}$ PCB 28    | 79% (10%)          |
| $^{13}\text{C}$ PCB 52    | 84% (10%)          |
| $^{13}\text{C}$ PCB 118   | 96% (12%)          |
| $^{13}\text{C}$ PCB 153   | 90% (8%)           |
| $^{13}\text{C}$ PCB 180   | 90% (9%)           |
| $^{13}\text{C}$ PCB 208   | 61% (13%)          |
| $^{13}\text{C}$ PCB 209   | 60% (15%)          |
| <i>Internal Standard</i>  |                    |
| $^{13}\text{C}$ PCB 70    |                    |
| $^{13}\text{C}$ PCB 111   |                    |
| $^{13}\text{C}$ PCB 138   |                    |
| $^{13}\text{C}$ PCB 170   |                    |

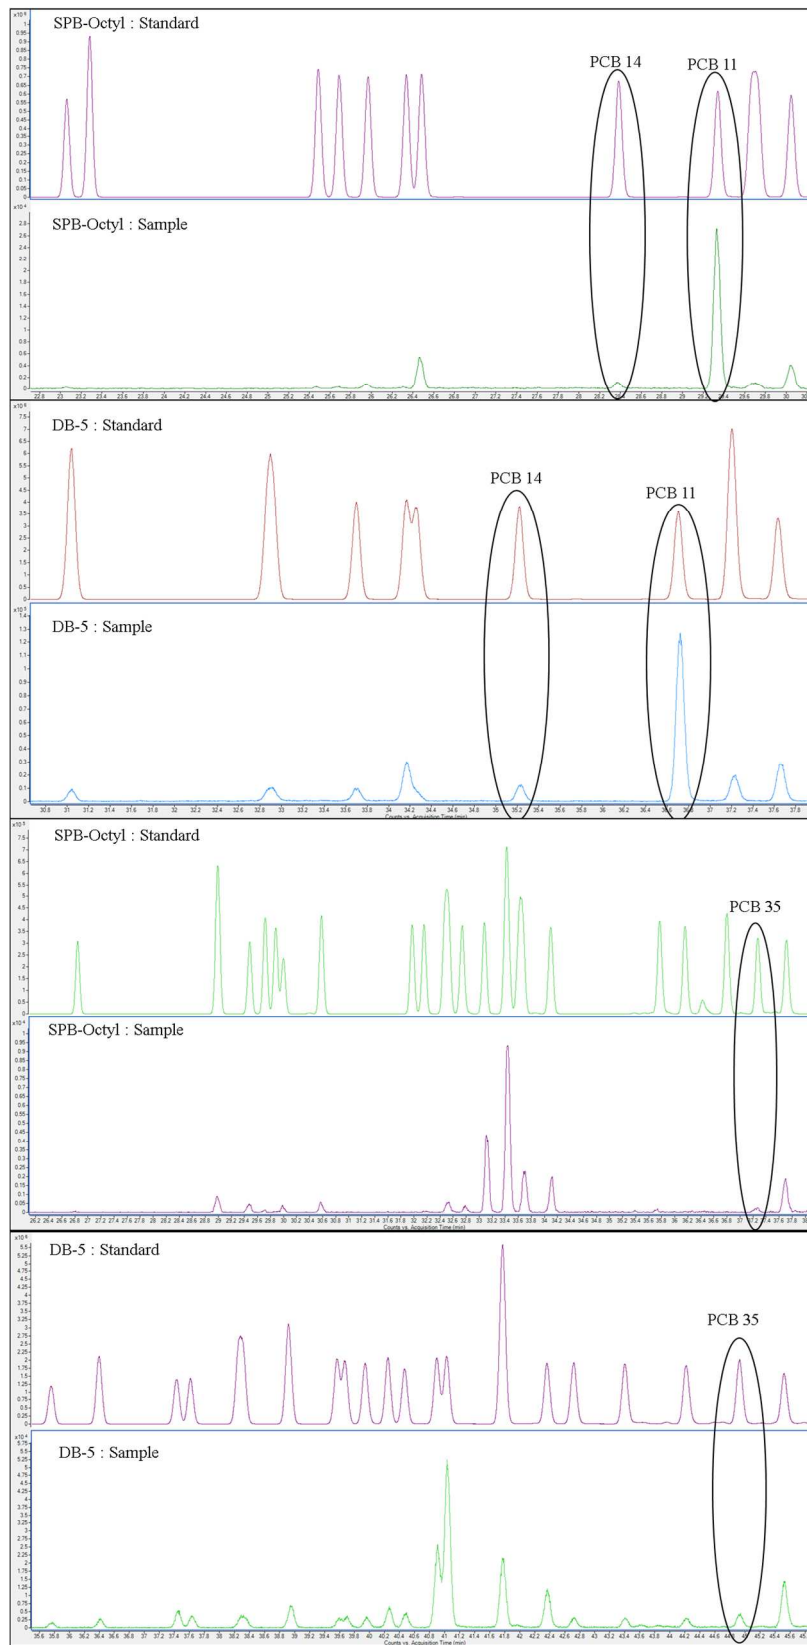

24

25 **Figure S1.** Example chromatogram of PCB 11, 14 and 35 in PCB standards and serum sample of one of  
 26 our participants analyzed in GC-MS/MS using SPB-Octyl and DB-5 columns.

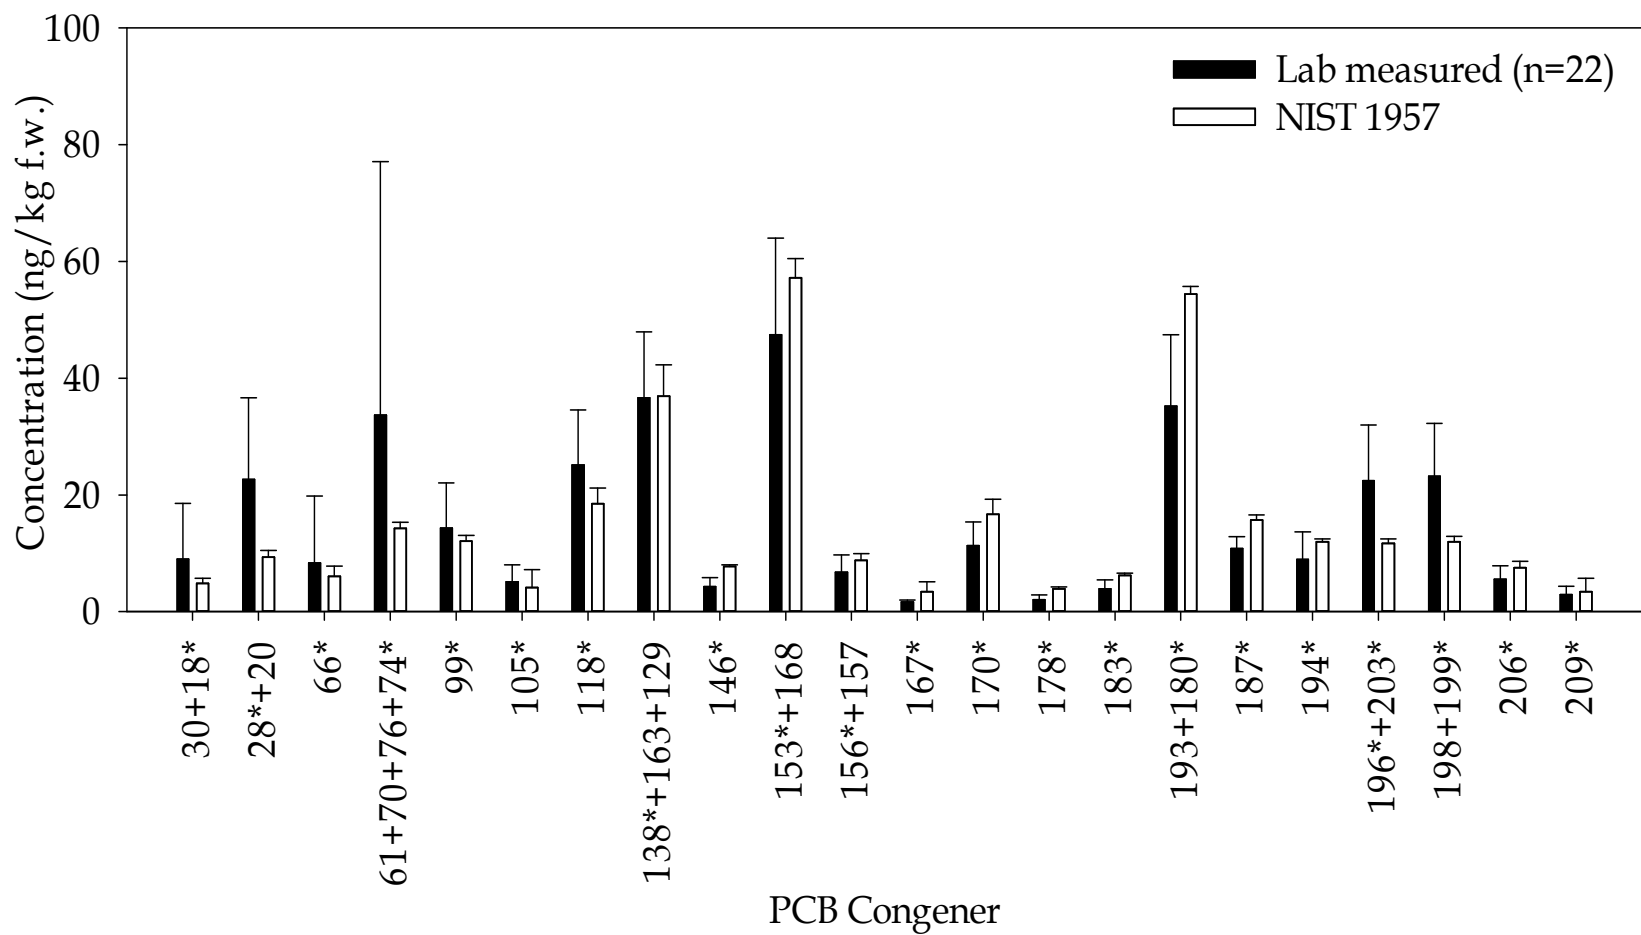

27

28 **Figure S2.** Comparison of average lab measured (n=22) on each PCB congener in NIST SRM 1957 to values certified by NIST. (\* represents  
 29 PCB congener that is certified by NIST)

30 **Table S2.** Limit of Quantification (LOQ) for each non-Aroclor PCB congener

| <b>Non-Aroclor<br/>PCB Congener</b> | <b>LOQ (ng/sample)</b> | <b>Non-Aroclor<br/>PCB Congener</b> | <b>LOQ (ng/sample)</b> |
|-------------------------------------|------------------------|-------------------------------------|------------------------|
| 11                                  | 0.2413                 | 121                                 | 0.0006                 |
| 14                                  | 0.0083                 | 126                                 | 0.0014                 |
| 23                                  | 0.0015                 | 127                                 | 0.0010                 |
| 24                                  | 0.0014                 | 131                                 | 0.0007                 |
| 34                                  | 0.0009                 | 133                                 | 0.0004                 |
| 35                                  | 0.0041                 | 139+140                             | 0.0011                 |
| 36                                  | 0.0011                 | 142                                 | 0.0004                 |
| 38                                  | 0.0009                 | 143                                 | 0.0005                 |
| 39                                  | 0.0010                 | 145                                 | 0.0005                 |
| 54                                  | 0.0018                 | 148                                 | 0.0004                 |
| 55                                  | 0.0030                 | 150                                 | 0.0004                 |
| 57                                  | 0.0015                 | 152                                 | 0.0005                 |
| 58                                  | 0.0019                 | 154                                 | 0.0003                 |
| 67                                  | 0.0024                 | 155                                 | 0.0004                 |
| 68                                  | 0.0020                 | 159                                 | 0.0005                 |
| 72                                  | 0.0016                 | 160                                 | 0.0016                 |
| 73                                  | 0.0014                 | 161                                 | 0.0004                 |
| 78                                  | 0.0024                 | 162                                 | 0.0007                 |
| 79                                  | 0.0014                 | 165                                 | 0.0003                 |
| 80                                  | 0.0015                 | 169                                 | 0.0008                 |
| 81                                  | 0.0018                 | 175                                 | 0.0017                 |
| 88                                  | 0.0039                 | 181                                 | 0.0021                 |
| 89                                  | 0.0010                 | 182                                 | 0.0015                 |
| 100+93                              | 0.0017                 | 184                                 | 0.0002                 |
| 94                                  | 0.0012                 | 186                                 | 0.0002                 |
| 96                                  | 0.0010                 | 188                                 | 0.0003                 |
| 98                                  | 0.0013                 | 189                                 | 0.0042                 |
| 103                                 | 0.0009                 | 191                                 | 0.0012                 |
| 104                                 | 0.0008                 | 192                                 | 0.0012                 |
| 106                                 | 0.0006                 | 197                                 | 0.0009                 |
| 111                                 | 0.0008                 | 204                                 | 0.0019                 |
| 112                                 | 0.0099                 | 205                                 | 0.0017                 |
| 117                                 | 0.0043                 | 207                                 | 0.0025                 |
| 120                                 | 0.0005                 | 209                                 | 0.0017                 |

32 **Table S3.** Weight percent of 209 PCB congeners in our laboratory measurement of Aroclor 1016, 1221,  
 33 1242, 1254 and 1248  
 34

| PCB Congener | Aroclor |        |       |       |       |
|--------------|---------|--------|-------|-------|-------|
|              | 1016    | 1221   | 1242  | 1254  | 1248  |
| 1            | 0.57%   | 37.71% | 0.58% | 0.03% | 0.05% |
| 2            | 0.03%   | 3.58%  | 0.04% | 0.00% | 0.00% |
| 3            | 0.17%   | 18.84% | 0.21% | 0.02% | 0.02% |
| 4            | 3.56%   | 6.00%  | 3.18% | 0.01% | 0.31% |
| 5            | 0.19%   | 0.76%  | 0.17% | 0.00% | 0.01% |
| 6            | 1.66%   | 3.33%  | 1.49% | 0.01% | 0.13% |
| 7            | 0.33%   | 1.54%  | 0.29% | 0.00% | 0.02% |
| 8            | 8.12%   | 10.42% | 7.08% | 0.03% | 0.82% |
| 9            | 0.58%   | 1.57%  | 0.51% | 0.00% | 0.04% |
| 10           | 0.17%   | 0.58%  | 0.15% | 0.00% | 0.01% |
| 11           | 0.02%   | 0.07%  | 0.01% | 0.00% | 0.00% |
| 13+12        | 0.31%   | 1.13%  | 0.26% | 0.00% | 0.02% |
| 14           | 0.00%   | 0.00%  | 0.00% | 0.00% | 0.00% |
| 15           | 2.18%   | 2.46%  | 1.83% | 0.01% | 0.20% |
| 16           | 3.83%   | 0.53%  | 3.33% | 0.02% | 1.14% |
| 17           | 3.72%   | 0.55%  | 3.27% | 0.01% | 1.09% |
| 30+18        | 8.56%   | 1.14%  | 7.50% | 0.06% | 3.67% |
| 19           | 0.90%   | 0.13%  | 0.81% | 0.00% | 0.22% |
| 28+20        | 9.01%   | 1.14%  | 7.51% | 0.06% | 3.80% |
| 21+33        | 6.28%   | 0.81%  | 5.20% | 0.03% | 2.36% |
| 22           | 3.48%   | 0.44%  | 2.91% | 0.02% | 1.40% |
| 23           | 0.02%   | 0.00%  | 0.01% | 0.00% | 0.00% |
| 24           | 0.13%   | 0.03%  | 0.12% | 0.00% | 0.01% |
| 25           | 0.71%   | 0.11%  | 0.60% | 0.00% | 0.12% |
| 29+26        | 1.64%   | 0.23%  | 1.37% | 0.01% | 0.44% |
| 27           | 0.53%   | 0.08%  | 0.46% | 0.00% | 0.13% |
| 31           | 8.85%   | 1.07%  | 7.39% | 0.14% | 4.90% |
| 32           | 2.22%   | 0.29%  | 1.93% | 0.01% | 0.90% |
| 34           | 0.03%   | 0.01%  | 0.03% | 0.00% | 0.01% |
| 35           | 0.09%   | 0.02%  | 0.08% | 0.01% | 0.01% |
| 36           | 0.00%   | 0.00%  | 0.00% | 0.00% | 0.00% |
| 37           | 1.77%   | 0.25%  | 1.75% | 0.02% | 0.69% |
| 38           | 0.01%   | 0.00%  | 0.01% | 0.00% | 0.01% |
| 39           | 0.00%   | 0.01%  | 0.02% | 0.00% | 0.01% |
| 71+40        | 2.27%   | 0.24%  | 1.99% | 0.26% | 3.13% |
| 41           | 0.82%   | 0.09%  | 0.67% | 0.02% | 0.77% |
| 42           | 1.48%   | 0.16%  | 1.27% | 0.12% | 1.79% |
| 43           | 0.25%   | 0.03%  | 0.21% | 0.02% | 0.26% |

|               |       |       |       |       |        |
|---------------|-------|-------|-------|-------|--------|
| 65+47+44      | 4.35% | 0.47% | 3.70% | 0.84% | 6.27%  |
| 45            | 2.51% | 0.26% | 2.13% | 0.09% | 2.58%  |
| 46            | 0.43% | 0.05% | 0.35% | 0.02% | 0.45%  |
| 48            | 1.52% | 0.16% | 1.26% | 0.08% | 1.65%  |
| 69+49         | 2.96% | 0.31% | 2.49% | 0.46% | 3.97%  |
| 50+53         | 0.95% | 0.10% | 0.80% | 0.08% | 1.13%  |
| 51            | 0.26% | 0.03% | 0.20% | 0.01% | 0.24%  |
| 52            | 4.53% | 0.50% | 3.80% | 1.57% | 7.37%  |
| 54            | 0.02% | 0.00% | 0.01% | 0.00% | 0.01%  |
| 55            | 0.02% | 0.02% | 0.10% | 0.02% | 0.06%  |
| 56            | 0.14% | 0.19% | 1.63% | 1.38% | 2.86%  |
| 57            | 0.02% | 0.01% | 0.02% | 0.00% | 0.02%  |
| 58            | 0.01% | 0.01% | 0.00% | 0.00% | 0.01%  |
| 60            | 0.07% | 0.14% | 1.17% | 0.72% | 1.85%  |
| 61+70+76+74   | 2.55% | 0.61% | 5.66% | 8.44% | 10.46% |
| 62+75+59      | 0.52% | 0.06% | 0.44% | 0.03% | 0.46%  |
| 63            | 0.11% | 0.02% | 0.15% | 0.08% | 0.23%  |
| 64            | 2.19% | 0.23% | 1.89% | 0.41% | 3.20%  |
| 66            | 0.99% | 0.37% | 3.24% | 3.03% | 5.69%  |
| 67            | 0.12% | 0.02% | 0.13% | 0.02% | 0.11%  |
| 68            | 0.01% | 0.01% | 0.01% | 0.00% | 0.01%  |
| 72            | 0.02% | 0.01% | 0.02% | 0.00% | 0.02%  |
| 73            | 0.00% | 0.00% | 0.00% | 0.00% | 0.00%  |
| 77            | 0.00% | 0.03% | 0.26% | 0.14% | 0.38%  |
| 78            | 0.00% | 0.00% | 0.00% | 0.00% | 0.00%  |
| 79            | 0.00% | 0.00% | 0.02% | 0.07% | 0.02%  |
| 80            | 0.00% | 0.00% | 0.00% | 0.00% | 0.00%  |
| 81            | 0.00% | 0.00% | 0.01% | 0.00% | 0.01%  |
| 82            | 0.00% | 0.03% | 0.22% | 1.38% | 0.72%  |
| 83            | 0.00% | 0.01% | 0.06% | 0.24% | 0.18%  |
| 84            | 0.12% | 0.05% | 0.33% | 1.52% | 1.12%  |
| 116+85        | 0.00% | 0.03% | 0.23% | 2.13% | 0.87%  |
| 119+109+86+97 | 0.01% | 0.05% | 0.30% | 2.21% | 1.02%  |
| 125+87        | 0.01% | 0.06% | 0.46% | 3.55% | 1.50%  |
| 88            | 0.00% | 0.01% | 0.00% | 0.00% | 0.00%  |
| 89            | 0.02% | 0.01% | 0.05% | 0.06% | 0.13%  |
| 113+90+101    | 0.08% | 0.11% | 0.69% | 5.97% | 2.35%  |
| 91            | 0.15% | 0.02% | 0.20% | 0.52% | 0.62%  |
| 92            | 0.03% | 0.02% | 0.12% | 0.69% | 0.40%  |
| 100+93        | 0.02% | 0.01% | 0.02% | 0.02% | 0.05%  |
| 94            | 0.01% | 0.00% | 0.01% | 0.01% | 0.03%  |
| 95            | 0.62% | 0.10% | 0.66% | 2.24% | 2.16%  |
| 96            | 0.03% | 0.01% | 0.03% | 0.02% | 0.07%  |

|             |       |       |       |        |       |
|-------------|-------|-------|-------|--------|-------|
| 98          | 0.00% | 0.00% | 0.00% | 0.00%  | 0.00% |
| 99          | 0.03% | 0.06% | 0.46% | 4.50%  | 1.55% |
| 102         | 0.07% | 0.01% | 0.07% | 0.09%  | 0.21% |
| 103         | 0.01% | 0.00% | 0.01% | 0.01%  | 0.02% |
| 104         | 0.00% | 0.00% | 0.00% | 0.00%  | 0.00% |
| 105         | 0.00% | 0.05% | 0.39% | 7.68%  | 1.58% |
| 106         | 0.00% | 0.00% | 0.00% | 0.00%  | 0.00% |
| 107         | 0.00% | 0.01% | 0.05% | 0.80%  | 0.16% |
| 108+124     | 0.00% | 0.01% | 0.03% | 0.48%  | 0.09% |
| 110         | 0.00% | 0.11% | 0.77% | 8.42%  | 2.95% |
| 111         | 0.00% | 0.00% | 0.00% | 0.00%  | 0.00% |
| 112         | 0.00% | 0.00% | 0.01% | 0.00%  | 0.00% |
| 114         | 0.00% | 0.01% | 0.03% | 0.43%  | 0.11% |
| 115         | 0.00% | 0.00% | 0.03% | 0.00%  | 0.00% |
| 117         | 0.00% | 0.01% | 0.02% | 0.00%  | 0.00% |
| 118         | 0.00% | 0.08% | 0.62% | 13.91% | 2.46% |
| 120         | 0.00% | 0.00% | 0.00% | 0.00%  | 0.00% |
| 121         | 0.00% | 0.00% | 0.00% | 0.00%  | 0.00% |
| 122         | 0.00% | 0.00% | 0.02% | 0.21%  | 0.06% |
| 123         | 0.00% | 0.00% | 0.02% | 0.27%  | 0.07% |
| 126         | 0.00% | 0.00% | 0.00% | 0.02%  | 0.00% |
| 127         | 0.00% | 0.00% | 0.00% | 0.00%  | 0.00% |
| 166+128     | 0.00% | 0.00% | 0.01% | 1.52%  | 0.09% |
| 138+163+129 | 0.00% | 0.02% | 0.07% | 6.97%  | 0.45% |
| 130         | 0.00% | 0.00% | 0.01% | 0.36%  | 0.03% |
| 131         | 0.00% | 0.00% | 0.00% | 0.09%  | 0.01% |
| 132         | 0.00% | 0.01% | 0.03% | 1.63%  | 0.18% |
| 133         | 0.00% | 0.00% | 0.00% | 0.04%  | 0.00% |
| 134         | 0.00% | 0.00% | 0.01% | 0.21%  | 0.03% |
| 151+135     | 0.00% | 0.01% | 0.02% | 0.51%  | 0.09% |
| 136         | 0.00% | 0.00% | 0.01% | 0.25%  | 0.05% |
| 137         | 0.00% | 0.00% | 0.01% | 0.59%  | 0.04% |
| 139+140     | 0.00% | 0.00% | 0.00% | 0.12%  | 0.01% |
| 141         | 0.00% | 0.00% | 0.01% | 0.66%  | 0.06% |
| 142         | 0.00% | 0.00% | 0.00% | 0.00%  | 0.00% |
| 143         | 0.00% | 0.00% | 0.00% | 0.02%  | 0.00% |
| 144         | 0.00% | 0.00% | 0.00% | 0.12%  | 0.02% |
| 145         | 0.00% | 0.00% | 0.00% | 0.00%  | 0.00% |
| 146         | 0.00% | 0.00% | 0.01% | 0.44%  | 0.04% |
| 147+149     | 0.00% | 0.02% | 0.05% | 2.02%  | 0.25% |
| 148         | 0.00% | 0.00% | 0.00% | 0.00%  | 0.00% |
| 150         | 0.00% | 0.00% | 0.00% | 0.00%  | 0.00% |
| 152         | 0.00% | 0.00% | 0.00% | 0.00%  | 0.00% |



|         |       |       |       |       |       |
|---------|-------|-------|-------|-------|-------|
| 153+168 | 0.00% | 0.01% | 0.03% | 3.65% | 0.22% |
| 154     | 0.00% | 0.00% | 0.00% | 0.02% | 0.00% |
| 155     | 0.00% | 0.00% | 0.00% | 0.00% | 0.00% |
| 156+157 | 0.00% | 0.00% | 0.01% | 1.62% | 0.07% |
| 158     | 0.00% | 0.00% | 0.01% | 0.82% | 0.05% |
| 159     | 0.00% | 0.00% | 0.00% | 0.00% | 0.00% |
| 160     | 0.00% | 0.00% | 0.00% | 0.00% | 0.00% |
| 161     | 0.00% | 0.00% | 0.00% | 0.00% | 0.00% |
| 162     | 0.00% | 0.00% | 0.00% | 0.03% | 0.00% |
| 164     | 0.00% | 0.00% | 0.00% | 0.27% | 0.02% |
| 165     | 0.00% | 0.00% | 0.00% | 0.00% | 0.00% |
| 167     | 0.00% | 0.00% | 0.00% | 0.36% | 0.02% |
| 169     | 0.00% | 0.00% | 0.00% | 0.00% | 0.00% |
| 170     | 0.00% | 0.00% | 0.00% | 0.45% | 0.02% |
| 171+173 | 0.00% | 0.00% | 0.00% | 0.12% | 0.01% |
| 172     | 0.00% | 0.00% | 0.00% | 0.04% | 0.00% |
| 174     | 0.00% | 0.00% | 0.00% | 0.16% | 0.01% |
| 175     | 0.00% | 0.00% | 0.00% | 0.01% | 0.00% |
| 176     | 0.00% | 0.00% | 0.00% | 0.02% | 0.00% |
| 177     | 0.00% | 0.00% | 0.00% | 0.10% | 0.01% |
| 178     | 0.00% | 0.00% | 0.00% | 0.02% | 0.00% |
| 179     | 0.00% | 0.00% | 0.00% | 0.03% | 0.00% |
| 193+180 | 0.00% | 0.00% | 0.00% | 0.48% | 0.03% |
| 181     | 0.00% | 0.00% | 0.00% | 0.01% | 0.00% |
| 182     | 0.00% | 0.00% | 0.00% | 0.00% | 0.00% |
| 183     | 0.00% | 0.00% | 0.00% | 0.12% | 0.01% |
| 184     | 0.00% | 0.00% | 0.00% | 0.00% | 0.00% |
| 185     | 0.00% | 0.00% | 0.00% | 0.01% | 0.00% |
| 186     | 0.00% | 0.00% | 0.00% | 0.00% | 0.00% |
| 187     | 0.00% | 0.00% | 0.00% | 0.10% | 0.02% |
| 188     | 0.00% | 0.00% | 0.00% | 0.00% | 0.00% |
| 189     | 0.00% | 0.00% | 0.00% | 0.03% | 0.00% |
| 190     | 0.00% | 0.00% | 0.00% | 0.07% | 0.00% |
| 191     | 0.00% | 0.00% | 0.00% | 0.02% | 0.00% |
| 192     | 0.00% | 0.00% | 0.00% | 0.00% | 0.00% |
| 194     | 0.00% | 0.00% | 0.00% | 0.02% | 0.00% |
| 195     | 0.00% | 0.00% | 0.00% | 0.01% | 0.00% |
| 196     | 0.00% | 0.00% | 0.00% | 0.01% | 0.00% |
| 197     | 0.00% | 0.00% | 0.00% | 0.00% | 0.00% |
| 198+199 | 0.00% | 0.00% | 0.00% | 0.01% | 0.01% |
| 200     | 0.00% | 0.00% | 0.00% | 0.00% | 0.00% |
| 201     | 0.00% | 0.00% | 0.00% | 0.00% | 0.00% |
| 202     | 0.00% | 0.00% | 0.00% | 0.00% | 0.00% |

|              |                |                |                |                |                |
|--------------|----------------|----------------|----------------|----------------|----------------|
| 203          | 0.00%          | 0.00%          | 0.00%          | 0.01%          | 0.00%          |
| 204          | 0.00%          | 0.00%          | 0.00%          | 0.00%          | 0.00%          |
| 205          | 0.00%          | 0.00%          | 0.00%          | 0.00%          | 0.00%          |
| 206          | 0.00%          | 0.00%          | 0.00%          | 0.01%          | 0.01%          |
| 207          | 0.00%          | 0.00%          | 0.00%          | 0.00%          | 0.00%          |
| 208          | 0.00%          | 0.00%          | 0.00%          | 0.00%          | 0.00%          |
| 209          | 0.00%          | 0.00%          | 0.00%          | 0.00%          | 0.00%          |
| <b>TOTAL</b> | <b>100.00%</b> | <b>100.00%</b> | <b>100.00%</b> | <b>100.00%</b> | <b>100.00%</b> |
